# Supplementary material for: Childhood and Adolescence Gender Role Nonconformity and Gender and Sexuality Diversity in Young Adulthood
Source: PubMed Central journal article supplement (PMC10520839; doi:10.1001/jamapediatrics.2023.3873), 2023-09-25
Supplement: jamapediatr-e233873-s001.pdf [file jamapediatr-e233873-s001.pdf]

## Supplementary Online Content

Marino JL, Lin A, Davies C, Kang M, Bista S, Skinner SR. Measures of childhood and adolescence gender role nonconformity and gender and sexuality diversity in young adulthood. *JAMA Pediatrics*. Published online September 25, 2023.

doi:10.1001/jamapediatrics.2023.3873

**eTable 1.** Comparison to Population-Based Data

**eTable 2.** Relationships Between Completion of ASEBA Items in Previous Follow-ups and Gen2 Participant Attendance at Year-27 Follow-up

This supplementary material has been provided by the authors to give readers additional information about their work.

**eTable 1. Comparison to population-based data**

|                                | <b>Western Australians<br/>25-29 years old<br/>%</b> | <b>Gen2 participants of the<br/>Raine Study<br/>Year 27<br/>%</b> |
|--------------------------------|------------------------------------------------------|-------------------------------------------------------------------|
| Employment status              |                                                      |                                                                   |
| Full time                      | 49.4                                                 | 57.0                                                              |
| Part time                      | 17.3                                                 | 19.2                                                              |
| Employed, away from work       | 4.2                                                  | 4.0                                                               |
| Unemployed, out of labor force | 20.9                                                 | 5.6                                                               |
| Other <sup>a</sup>             | -                                                    | 9.4                                                               |
| Missing, unstated, unknown     | 8.2                                                  | 4.8                                                               |
| Total personal income, weekly  |                                                      |                                                                   |
| <\$1                           | 7.8                                                  | 4.8                                                               |
| \$1-\$299                      | 7.7                                                  | 8.5                                                               |
| \$300-399                      | 4.2                                                  | 5.5                                                               |
| \$400-799                      | 18.7                                                 | 16.9                                                              |
| \$800-999                      | 10.5                                                 | 12.8                                                              |
| \$1000-1249                    | 12.5                                                 | 19.6                                                              |
| \$1250-1449                    | 9.4                                                  | 11.4                                                              |
| \$1500-1999                    | 11.4                                                 | 12.8                                                              |
| \$2000-2999                    | 5.9                                                  | 6.2                                                               |
| \$3000+                        | 1.8                                                  | 0.8                                                               |
| Missing, unstated              | 10.0                                                 | 0.8                                                               |

a. This category is not included in 2016 Census Labour Force Status classification, and includes casual work, unpaid/voluntary work, self-employment, home/carer duties, and unspecified work.

**eTable 2. Relationships between completion of ASEBA items in previous follow-ups and Gen2 participant attendance at year-27 follow-up**

|                                      | Year-27 follow-up                 |                             | p                |
|--------------------------------------|-----------------------------------|-----------------------------|------------------|
|                                      | Did not attend<br>N=1714<br>N (%) | Attended<br>N=1154<br>N (%) |                  |
| Year 5                               |                                   |                             |                  |
| Did not attend follow-up             | 570 (33.3)                        | 98 (8.5)                    | <b>&lt;0.001</b> |
| Skipped CBCL                         | 17 (1.0)                          | 3 (0.3)                     | 0.2              |
| Skipped ASEBA gender behavior item   | 9 (0.5)                           | 15 (1.3)                    | <b>0.04</b>      |
| Skipped ASEBA gender wish item       | 9 (0.5)                           | 7 (0.6)                     | 0.8              |
| Skipped both                         | 1 (0.1)                           | 1 (0.1)                     | >0.9             |
| Non-conforming ASEBA gender behavior | 121 (10.9)                        | 127 (12.3)                  | 0.5              |
| Non-conforming ASEBA gender wish     | 25 (2.2)                          | 21 (2.0)                    | 0.7              |
| Year 8                               |                                   |                             |                  |
| Did not attend follow-up             | 660 (38.5)                        | 95 (8.2)                    | <b>&lt;0.001</b> |
| Skipped CBCL                         | 12 (0.7)                          | 13 (1.1)                    | 0.3              |
| Skipped ASEBA gender behavior item   | 8 (0.5)                           | 4 (0.4)                     | 0.8              |
| Skipped ASEBA gender wish item       | 8 (0.5)                           | 5 (0.4)                     | >0.9             |
| Skipped both                         | 0                                 | 0                           | -                |
| Non-conforming ASEBA gender behavior | 85 (8.3)                          | 96 (9.2)                    | 0.4              |
| Non-conforming ASEBA gender wish     | 17 (1.6)                          | 22 (2.1)                    | 0.4              |
| Year 10                              |                                   |                             |                  |
| Did not attend follow-up             | 751 (43.8)                        | 93 (8.1)                    | <b>&lt;0.001</b> |
| Skipped CBCL                         | 5 (0.3)                           | 0                           | 0.09             |
| Skipped ASEBA gender behavior item   | 4 (0.2)                           | 2 (0.2)                     | >0.9             |
| Skipped ASEBA gender wish item       | 1 (0.1)                           | 2 (0.2)                     | 0.6              |
| Skipped both                         | 0                                 | 0                           | -                |
| Non-conforming ASEBA gender behavior | 48 (5.1)                          | 55 (5.2)                    | 0.9              |
| Non-conforming ASEBA gender wish     | 11 (1.2)                          | 9 (0.9)                     | 0.5              |
| Year 14 – Gen1 parent                |                                   |                             |                  |
| Did not attend follow-up             | 923 (53.9)                        | 146 (12.7)                  | <b>&lt;0.001</b> |
| Skipped CBCL                         | 9 (0.5)                           | 3 (0.3)                     | 0.4              |
| Skipped ASEBA gender behavior item   | 1 (0.1)                           | 4 (0.4)                     | 0.2              |
| Skipped ASEBA gender wish item       | 1 (0.1)                           | 1 (0.1)                     | >0.9             |
| Skipped both                         | 0                                 | 0                           | -                |
| Non-conforming ASEBA gender behavior | 29 (3.7)                          | 31 (3.1)                    | 0.5              |
| Non-conforming ASEBA gender wish     | 3 (0.4)                           | 6 (0.6)                     | 0.5              |
| Year 17 – Gen1 parent                |                                   |                             |                  |
| Did not attend follow-up             | 1175 (68.6)                       | 280 (24.3)                  | <b>&lt;0.001</b> |
| Skipped CBCL                         | 14 (0.8)                          | 10 (0.9)                    | >0.9             |
| Skipped ASEBA gender behavior item   | 2 (0.1)                           | 0                           | 0.5              |
| Skipped ASEBA gender wish item       | 1 (0.1)                           | 4 (0.4)                     | 0.2              |
| Skipped both                         | 0                                 | 0                           | -                |
| Non-conforming ASEBA gender behavior | 14 (2.7)                          | 22 (2.6)                    | 0.9              |
| Non-conforming ASEBA gender wish     | 3 (0.6)                           | 4 (0.5)                     | 0.8              |
| Year 14 – Gen2 adolescent            |                                   |                             |                  |
| Did not attend follow-up             | 1049 (61.2)                       | 214 (18.5)                  | <b>&lt;0.001</b> |
| Skipped CBCL                         | 6 (0.4)                           | 2 (0.2)                     | 0.5              |
| Skipped ASEBA gender wish item       | 1 (0.1)                           | 0                           | >0.9             |
| Non-conforming ASEBA gender wish     | 41 (6.2)                          | 42 (4.5)                    | 0.1              |
| Year 17 – Gen2 adolescent            |                                   |                             |                  |
| Did not attend follow-up             | 394 (23.0)                        | 855 (75.1)                  | <b>&lt;0.001</b> |
| Skipped CBCL                         | 1 (0.1)                           | 2 (0.2)                     | 0.6              |
| Skipped ASEBA gender wish item       | 4 (0.2)                           | 13 (1.1)                    | <b>0.005</b>     |
| Non-conforming ASEBA gender wish     | 37 (9.5)                          | 82 (9.8)                    | 0.9              |

ASEBA: Achenbach System of Empirically Based Assessment
